# Supplementary material for: Association of non-alcoholic fatty liver disease with major adverse cardiovascular events: A systematic review and meta-analysis
Source: PubMed Central journal article supplement (PMC5026028; doi:10.1038/srep33386), 2016-09-16

**Association of non-alcoholic fatty liver disease with major adverse cardiovascular events: A systematic review and meta-analysis**

*Author list:*

Shunquan Wu, Fuquan Wu, Yingying Ding, Jun Hou, Jingfeng Bi, Zheng Zhang

**Figure S1.** Flowchart for the selection of eligible studies

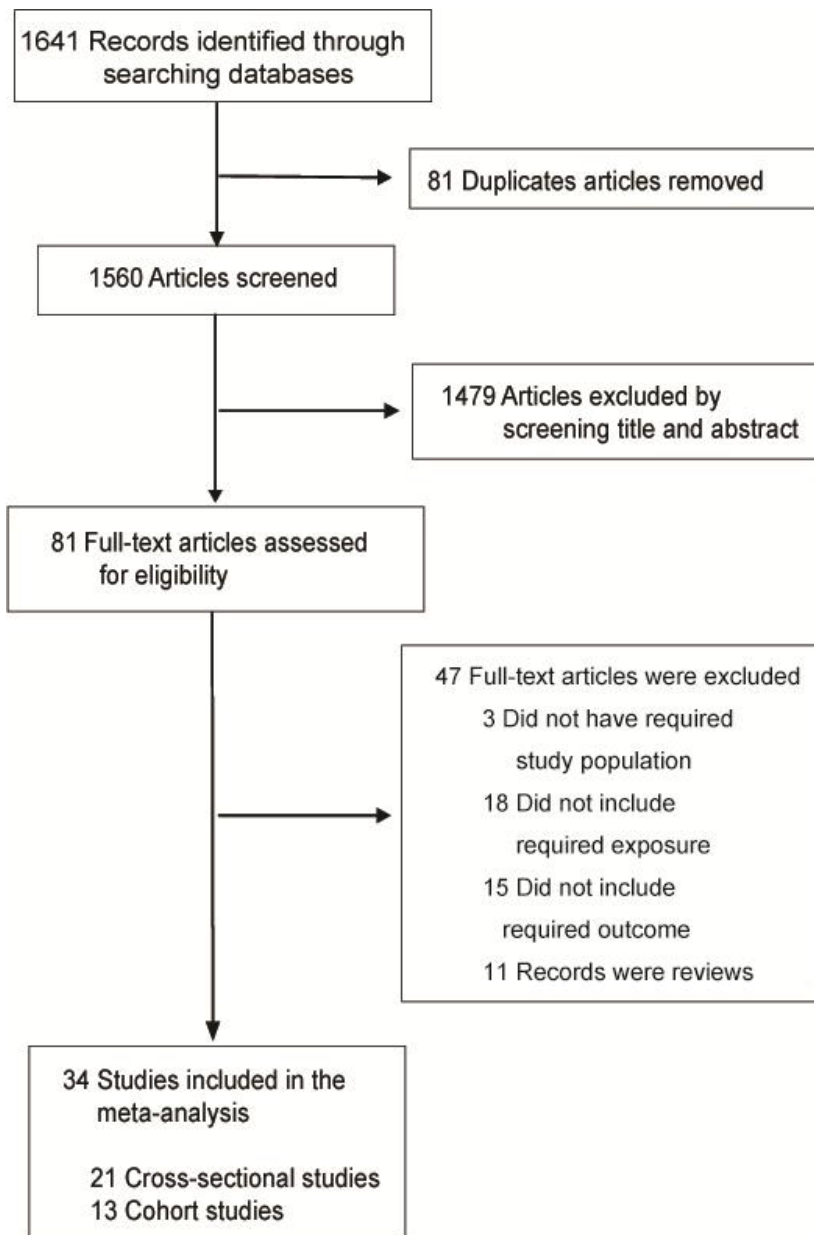

**Table S2.** Quality assessment of the included studies (cross-sectional studies)

| Study               | Selection                                                            |                           | Comparability                                                                                                                                                                                                                 | Exposure                       | Overall quality assessment score (of a maximum of 5) |
|---------------------|----------------------------------------------------------------------|---------------------------|-------------------------------------------------------------------------------------------------------------------------------------------------------------------------------------------------------------------------------|--------------------------------|------------------------------------------------------|
|                     | Representativeness of the sample                                     | Ascertainment of exposure | Comparability of groups on the basis of the design or analysis                                                                                                                                                                | Assessment of outcome          |                                                      |
| Agac et al, 2013    | No description                                                       | * Ultrasound              | ** Study controls for sex, age, BMI, waist circumference, smoking status, family history of CAD, total cholesterol, triglycerides, HDL-C, LDL-C, ALT, serum creatinine, presence of hypertension, diabetes mellitus, and MetS | * Independent blind assessment | 4                                                    |
| Agarwal et al, 2011 | No description                                                       | * Ultrasound              | * Study controls for age                                                                                                                                                                                                      | * Independent blind assessment | 3                                                    |
| Arslan et al, 2007  | No description                                                       | * Ultrasound              | ** Study controls for age, male sex, plasma LDL level, BMI, smoking history, and individual components of the metabolic syndrome                                                                                              | * Independent blind assessment | 4                                                    |
| Chan et al, 2014    | * Somewhat representative of the average population in the community | * Ultrasound              | Study does not control for other factors                                                                                                                                                                                      | * Independent blind assessment | 3                                                    |
| Chen et al, 2010    | * Somewhat representative of the average population in the           | * Ultrasound              | ** Study controls for sex, age, BMI, smoking, hypertension,                                                                                                                                                                   | * Independent blind assessment | 5                                                    |

|                     |                                                                      |              |                                                                                                                                                                                   |                                |   |
|---------------------|----------------------------------------------------------------------|--------------|-----------------------------------------------------------------------------------------------------------------------------------------------------------------------------------|--------------------------------|---|
|                     | community                                                            |              | diabetes mellitus, fasting plasma glucose, TC, TG, HDL, LDL, ALT, AST, SUA, and gallbladder stones                                                                                |                                |   |
| Chiang et al, 2010  | * Somewhat representative of the average population in the community | * Ultrasound | ** Study controls for age, elevated hsCRP level, metabolic syndrome, hypertension, diabetes, and dyslipidemia                                                                     | * Independent blind assessment | 5 |
| Choi et al, 2013    | No description                                                       | * Ultrasound | ** Study controls for age, gender, glucose, HbA1c, BMI, TC, TG, and LDL                                                                                                           | * Independent blind assessment | 4 |
| Choi et al, 2009    | * Truly representative of the average population in the community    | * Ultrasound | ** Study controls for age, gender, BMI, WC, and metabolic syndrome                                                                                                                | * Independent blind assessment | 5 |
| Huang et al, 2012   | * Truly representative of the average population in the community    | * Ultrasound | ** Study controls for age, sex, BMI, LDL-C, HOMA-IR score, regular exerciser, smoking status, drinking status, metabolic syndrome, and prior histories of cardiovascular diseases | * Independent blind assessment | 5 |
| Idilman et al, 2015 | No description                                                       | *CT images   | ** Study controls for age, gender, LDL levels, BMI, hypertension and smoking status                                                                                               | * Independent blind assessment | 4 |

|                          |                                                                   |              |                                                                                                                                                 |                                |   |
|--------------------------|-------------------------------------------------------------------|--------------|-------------------------------------------------------------------------------------------------------------------------------------------------|--------------------------------|---|
| Josef et al, 2013        | No description                                                    | *CT images   | ** Study controls for gender, age, smoking habits, metabolic syndrome, diabetes, BIM, and levels of ALT, HDL and LDL-C, TG, and fasting glucose | * Independent blind assessment | 4 |
| Lopez-Suarez et al, 2011 | * Truly representative of the average population in the community | * Ultrasound | ** Study controls for age, sex, sedentary lifestyle, smoking status, eGFR, diabetes, BMI, HDL-C, TG, and ALT                                    | * Independent blind assessment | 5 |
| Sun et al, 2011          | No description                                                    | *CT images   | ** Study controls for gender, age, previous myocardial infarction, TC, and AST                                                                  | * Independent blind assessment | 4 |
| Targher et al, 2006      | * Truly representative of the average population in the community | * Ultrasound | ** Study controls for age, sex, diabetes duration, HbA, smoking history, LDL-C, GGT levels, use of medications, and MetS                        | * Independent blind assessment | 5 |
| Targher et al, 2007      | * Truly representative of the average population in the community | * Ultrasound | ** Study controls for age, sex, BMI, smoking status, diabetes duration, A1C, LDL-C, and current use of medications                              | * Independent blind assessment | 5 |
| Targher et al, 2010      | No description                                                    | * Ultrasound | ** Study controls for age, sex, diabetes duration, HbA, smoking status, LDL-C, metabolic syndrome, BMI, SBP, HDL-C, TG, albuminuria,            | * Independent blind assessment | 4 |

|                       |                                                                   |              |                                                                                                                                                                                                                                                                                                                  |                                |   |
|-----------------------|-------------------------------------------------------------------|--------------|------------------------------------------------------------------------------------------------------------------------------------------------------------------------------------------------------------------------------------------------------------------------------------------------------------------|--------------------------------|---|
|                       |                                                                   |              | and medication use                                                                                                                                                                                                                                                                                               |                                |   |
| Targher et al, 2012   | No description                                                    | * Ultrasound | ** Study controls for age, gender, duration of diabetes, HbA, smoking status, alcohol consumption, physical activity level, family history of CVD, LDL-C, metabolic syndrome, BMI, SBP, HDL-C, TG, current use of anti-hypertensive, lipid-lowering or anti-platelet medications, estimated GFR, and albuminuria | * Independent blind assessment | 4 |
| Thakur et al, 2012    | No description                                                    | * Ultrasound | * Study controls for generalized and abdominal obesity, metabolic syndrome, fasting insulin, dyslipidemias, systolic and diastolic blood pressure and hs-CRP                                                                                                                                                     | * Independent blind assessment | 3 |
| VanWagner et al, 2014 | * Truly representative of the average population in the community | *CT images   | ** Study controls for age, race, sex, study center, income level, educational level, alcohol intake, smoking status, physical activity score, diabetes status, SBP, TC, HDL, and treatments for hypertension and dyslipidemia                                                                                    | * Independent blind assessment | 5 |

|                     |                                                                   |              |                                                                                                                                         |                                |   |
|---------------------|-------------------------------------------------------------------|--------------|-----------------------------------------------------------------------------------------------------------------------------------------|--------------------------------|---|
| Vendhan et al, 2014 | * Truly representative of the average population in the community | * Ultrasound | * Study controls for age, diabetes, hypercholesterolemia, HOMA-IR, and hypertension in some but not all the analyses                    | * Independent blind assessment | 4 |
| Wang et al, 2015    | * Truly representative of the average population in the community | * Ultrasound | ** Study controls for gender, age, BMI, hyperuricemia, AST, ALT, hypercholesterolemia, hypertriglyceridemia, and fasting plasma glucose | No description                 | 4 |

**Table S3.** Quality assessment of the included studies (cohort studies)

| Study             | Selection                                                         |                                                       |                           |                                                                          | Comparability                                                                                                      | Outcome                       |                                                                         |                                                                          | Overall quality assessment score (of a maximum of 9) |
|-------------------|-------------------------------------------------------------------|-------------------------------------------------------|---------------------------|--------------------------------------------------------------------------|--------------------------------------------------------------------------------------------------------------------|-------------------------------|-------------------------------------------------------------------------|--------------------------------------------------------------------------|------------------------------------------------------|
|                   | Representativeness of the exposed cohort                          | Selection of the non exposed cohort                   | Ascertainment of exposure | Demonstration that outcome of interest was not present at start of study | Comparability of cohorts on the basis of the design or analysis                                                    | Assessment of outcome         | Was follow-up long enough for outcomes to occur                         | Adequacy of follow up of cohorts                                         |                                                      |
| Adams et al, 2010 | * Truly representative of the average population in the community | * Drawn from the same community as the exposed cohort | * Ultrasound              | * The study demonstrated that death was not present at start of study    | ** Study controls for age, gender, obesity and date of diabetes diagnosis.                                         | *Independent blind assessment | *The study selects an adequate follow up period for outcome of interest | * Subjects lost to follow up unlikely to introduce bias (100% follow up) | 9                                                    |
| Dunn et al, 2008  | * Truly representative of the average population in the community | * Drawn from the same community as the exposed cohort | * Liver biopsy            | * The study demonstrated that disease was not present at start of study  | * Study controls for age, gender, race, SBP, DBP, WC, TC, HDL, TG, smoking, CRP, daily alcohol, physical activity, | *Independent blind assessment | *The study selects an adequate follow up period for outcome of interest | * Subjects lost to follow up unlikely to introduce bias (100% follow up) | 8                                                    |



|                       |                                                                      |                                                       |                |                                                                              |                                                                                |                                |                                                                         |                                                                          |   |
|-----------------------|----------------------------------------------------------------------|-------------------------------------------------------|----------------|------------------------------------------------------------------------------|--------------------------------------------------------------------------------|--------------------------------|-------------------------------------------------------------------------|--------------------------------------------------------------------------|---|
|                       |                                                                      |                                                       |                |                                                                              | diabetes, and HMG-CoA reductase inhibitor use in most but not all the analyses |                                |                                                                         |                                                                          |   |
| Ekstedt et al, 2015   | * Somewhat representative of the average population in the community | * Drawn from the same community as the exposed cohort | * Liver biopsy | The study did not demonstrate that disease was not present at start of study | The study did not report the factors that controlled for                       | * Independent blind assessment | *The study selects an adequate follow up period for outcome of interest | * Subjects lost to follow up unlikely to introduce bias (100% follow up) | 6 |
| Hamaguchi et al, 2007 | * Somewhat representative of the average population in the community | * Drawn from the same community as the exposed cohort | * Ultrasound   | The study did not demonstrate that disease was not present at start of study | ** Study controls for age, smoking, SBP, LDL-C, and metabolic syndrome         | Self-reported                  | *The study selects an adequate follow up period for outcome of interest | Subjects lost to follow up likely to introduce bias (68% follow up)      | 6 |
| Lazo et al, 2011      | * Truly representative of the average population in the community    | * Drawn from the same community as the exposed        | * Ultrasound   | * The study demonstrated that disease was not present at start of study      | ** Study controls for sex, race, education, smoking, alcohol                   | *Documented                    | *The study selects an adequate follow up period for outcome of          | * Subjects lost to follow up unlikely to introduce bias (78% follow up)  | 9 |

|                   |                                                                   |                                                       |                |                                                                         |                                                                                                                                      |                                |                                                                                |                                                                         |   |
|-------------------|-------------------------------------------------------------------|-------------------------------------------------------|----------------|-------------------------------------------------------------------------|--------------------------------------------------------------------------------------------------------------------------------------|--------------------------------|--------------------------------------------------------------------------------|-------------------------------------------------------------------------|---|
|                   |                                                                   | cohort                                                |                |                                                                         | consumption, physical activity, BMI, hypertension, hypercholesterolaemia, and diabetes                                               |                                | interest                                                                       |                                                                         |   |
| Ong et al, 2008   | * Truly representative of the average population in the community | * Drawn from the same community as the exposed cohort | * Liver enzyme | * The study demonstrated that disease was not present at start of study | ** Study controls for age, gender, race, education, income, BIM, HTN, and DM                                                         | * Documented                   | *The study selects an adequate follow up period for outcome of interest        | * Subjects lost to follow up unlikely to introduce bias (88% follow up) | 9 |
| Ryoo et al, 2014a | * Truly representative of the average population in the community | * Drawn from the same community as the exposed cohort | * Ultrasound   | * The study demonstrated that disease was not present at start of study | ** Study controls for age, HDL-C, log (hsCRP), serum creatinine, recent smoking status, regular exercise, MetS and diabetes mellitus | * Independent blind assessment | The study does not select an adequate follow up period for outcome of interest | * Subjects lost to follow up unlikely to introduce bias (79% follow up) | 8 |
| Ryoo et           | * Truly                                                           | * Drawn                                               | * Ultrasound   | * The study                                                             | ** Study                                                                                                                             | *                              | The study                                                                      | * Subjects                                                              | 8 |

|                       |                                                                   |                                                       |                |                                                                               |                                                                                                                           |                                |                                                                         |                                                                     |   |
|-----------------------|-------------------------------------------------------------------|-------------------------------------------------------|----------------|-------------------------------------------------------------------------------|---------------------------------------------------------------------------------------------------------------------------|--------------------------------|-------------------------------------------------------------------------|---------------------------------------------------------------------|---|
| al, 2014<br>b         | representative of the average population in the community         | from the same community as the exposed cohort         |                | demonstrated that disease was not present at start of study                   | controls for age, BMI, TG, serum creatinine, AST, ALT, GGT, recent smoking status, regular exercise and diabetes mellitus | Independent blind assessment   | does not select an adequate follow up period for outcome of interest    | lost to follow up unlikely to introduce bias (78% follow up)        |   |
| Stepanova et al, 2013 | No description                                                    | No description                                        | * Liver biopsy | * The study demonstrated that disease was not present at start of study       | ** Study controls for age, gender, race, obesity, diabetes, and hyperlipidemia                                            | * Documented                   | *The study selects an adequate follow up period for outcome of interest | Subjects lost to follow up likely to introduce bias (60% follow up) | 6 |
| Stepanova et al, 2012 | * Truly representative of the average population in the community | * Drawn from the same community as the exposed cohort | * Ultrasound   | The study does not demonstrate that disease was not present at start of study | ** Study controls for age, sex, race, obesity, diabetes mellitus, smoking, and family history of CVD                      | * Independent blind assessment | *The study selects an adequate follow up period for outcome of interest | Subjects lost to follow up likely to introduce bias (58% follow up) | 7 |

|                  |                                                                   |                                                       |              |                                                                               |                                                                                                                                                 |                                |                                                                                |                                                                          |   |
|------------------|-------------------------------------------------------------------|-------------------------------------------------------|--------------|-------------------------------------------------------------------------------|-------------------------------------------------------------------------------------------------------------------------------------------------|--------------------------------|--------------------------------------------------------------------------------|--------------------------------------------------------------------------|---|
| Sung et al, 2009 | * Truly representative of the average population in the community | * Drawn from the same community as the exposed cohort | * Ultrasound | The study does not demonstrate that disease was not present at start of study | * Study controls for age, BMI, smoking and exercise habits                                                                                      | * Independent blind assessment | The study does not select an adequate follow up period for outcome of interest | Subjects lost to follow up likely to introduce bias (54% follow up)      | 5 |
| Sung et al, 2014 | * Truly representative of the average population in the community | * Drawn from the same community as the exposed cohort | * Images     | * The study demonstrated that disease was not present at start of study       | ** Study controls for age, sex, alcohol consumption, smoking status, exercise, SBP, BMI, diabetes status, GGT, HOMA-IR, eGFR, and change in BMI | * Independent blind assessment | *The study selects an adequate follow up period for outcome of interest        | * Subjects lost to follow up unlikely to introduce bias (73% follow up)  | 9 |
| Wong et al, 2011 | No description                                                    | * Drawn from the same community as the exposed        | * Ultrasound | * The study demonstrated that disease was not present at start of study       | ** Study controls for age, gender, smoking, alcohol, diabetes,                                                                                  | * Independent blind assessment | The study does not select an adequate follow up period for                     | * Subjects lost to follow up unlikely to introduce bias (100% follow up) | 7 |

|  |  |        |  |  |                                                                                                                  |  |                        |  |  |
|--|--|--------|--|--|------------------------------------------------------------------------------------------------------------------|--|------------------------|--|--|
|  |  | cohort |  |  | hypertension,<br>SBP, DBP,<br>BMI, WC,<br>fasting glucose,<br>TC, HDL-C,<br>LDL-C, TG,<br>creatinine, and<br>ALT |  | outcome of<br>interest |  |  |
|--|--|--------|--|--|------------------------------------------------------------------------------------------------------------------|--|------------------------|--|--|

**Table S4.** Weighted mean difference in baseline risk factor levels among the included population, compared NAFLD participants with non-NAFLD participants

|                                      | <b>Number of comparisons in included studies</b> | <b>Number of population involved</b> | <b>Pooled WMD (95% CI)</b> | <b>P value</b> |
|--------------------------------------|--------------------------------------------------|--------------------------------------|----------------------------|----------------|
| Body mass index (kg/m <sup>2</sup> ) | 27                                               | 102,080                              | 2.82 (2.43 to 3.21)        | <0.001         |
| Waist circumference (cm)             | 18                                               | 71,109                               | 8.62 (7.70 to 9.54)        | <0.001         |
| Systolic blood pressure (mmHg)       | 21                                               | 108,307                              | 6.09 (4.82 to 7.35)        | <0.001         |
| Diastolic blood pressure (mmHg)      | 22                                               | 108,706                              | 3.77 (2.83 to 4.71)        | <0.001         |
| Total cholesterol (mg/dl)            | 19                                               | 83,903                               | 11.57 (8.54 to 14.61)      | <0.001         |
| HDL cholesterol (mg/dl)              | 27                                               | 101,642                              | -5.62 (-6.63 to -4.62)     | <0.001         |
| LDL cholesterol (mg/dl)              | 23                                               | 76,125                               | 7.62 (4.13 to 11.11)       | <0.001         |
| Triglycerides (mg/dl)                | 28                                               | 110,278                              | 52.27 (45.62 to 58.91)     | <0.001         |
| Fasting glucose (mg/dl)              | 22                                               | 106,481                              | 8.34 (7.00 to 9.69)        | <0.001         |
| Alanine aminotransferase (IU/L)      | 24                                               | 87,242                               | 14.03 (10.98 to 17.08)     | <0.001         |
| Aspartate aminotransferase (IU/L)    | 22                                               | 86,550                               | 6.04 (4.48 to 7.60)        | <0.001         |
| γ -glutamyltranspeptidase (IU/L)     | 14                                               | 74,040                               | 13.32 (9.88 to 16.76)      | <0.001         |
| Mean CIMT (mm)                       | 6                                                | 9,428                                | 0.06 (0.02 to 0.11)        | 0.010          |

CIMT, carotid intimal-medial thickness; HDL, high-density lipoprotein; LDL, low-density lipoprotein; NAFLD, non-alcoholic fatty liver disease; WMD, weighted mean difference

**Table S5.** Results of subgroup analyses

| Outcome                                  | Item Assessed in Analysis                      | Study Feature             | Cross-sectional Studies                                                                                                                | Cohort Studies                                                                                                                         |                                                    |
|------------------------------------------|------------------------------------------------|---------------------------|----------------------------------------------------------------------------------------------------------------------------------------|----------------------------------------------------------------------------------------------------------------------------------------|----------------------------------------------------|
|                                          |                                                |                           | Pooled OR (95% CI), $I^2$ statistics (%), $P$ -value for the heterogeneity $Q$ test, number of comparisons in included studies ( $n$ ) | Pooled HR (95% CI), $I^2$ statistics (%), $P$ -value for the heterogeneity $Q$ test, number of comparisons in included studies ( $n$ ) |                                                    |
| Overall mortality in NAFLD vs. non-NAFLD | Study design                                   | Population-based          | No study                                                                                                                               | 1.13 (0.92-1.39); $I^2=68.3\%$ , $P=0.013$ ; $n=5$                                                                                     |                                                    |
|                                          | Mean age                                       | Hospital-based            | $\geq 50$ years                                                                                                                        | No study                                                                                                                               | 1.23 (1.05-1.44); $I^2=0.0\%$ , $P=0.482$ ; $n=2$  |
|                                          |                                                |                           | $<50$ years                                                                                                                            | No study                                                                                                                               | 1.59 (0.93-2.72); $I^2=41.6\%$ , $P=0.191$ ; $n=2$ |
|                                          |                                                |                           |                                                                                                                                        | No study                                                                                                                               | 1.17 (0.90-1.52); $I^2=73.7\%$ , $P=0.010$ ; $n=4$ |
|                                          | Ethnicity                                      | Non-Asian                 | No study                                                                                                                               | 1.14 (0.99-1.32); $I^2=65.4\%$ , $P=0.008$ ; $n=7$                                                                                     |                                                    |
|                                          |                                                |                           | Asian                                                                                                                                  | No study                                                                                                                               | No study                                           |
|                                          | Presence of diabetes                           | Diabetic participants     | No study                                                                                                                               | 2.20 (1.10-4.20); $n=1$                                                                                                                |                                                    |
|                                          |                                                | Non-diabetic participants | No study                                                                                                                               | 1.15 (0.91-1.46); $n=1$                                                                                                                |                                                    |
|                                          | Study quality <sup>a</sup>                     | Combined                  | No study                                                                                                                               | 1.10 (0.94-1.29); $I^2=66.1\%$ , $P=0.019$ ; $n=5$                                                                                     |                                                    |
|                                          |                                                |                           | High                                                                                                                                   | No study                                                                                                                               | 1.13 (0.92-1.39); $I^2=68.3\%$ , $P=0.013$ ; $n=5$ |
|                                          |                                                |                           | Relatively low                                                                                                                         | No study                                                                                                                               | 1.23 (1.05-1.44); $I^2=0.0\%$ , $P=0.482$ ; $n=2$  |
|                                          | Adjustment for age and BMI/obesity and smoking | Studies adjusting         | No study                                                                                                                               | No study                                                                                                                               |                                                    |

|                                                       |                                  |                                  |                                                  |                                                   |
|-------------------------------------------------------|----------------------------------|----------------------------------|--------------------------------------------------|---------------------------------------------------|
|                                                       |                                  | <b>Studies not adjusting</b>     | No study                                         | 1.14 (0.99-1.32); $I^2=65.4\%$ , $P=0.008$ ; n=7  |
| <b>CVD mortality in NAFLD vs. non-NAFLD</b>           | <b>Study design</b>              | <b>Population-based</b>          | No study                                         | 0.99 (0.75-1.30); $I^2=57.2\%$ , $P=0.022$ ; n=8  |
|                                                       | <b>Mean age</b>                  | <b>Hospital-based</b>            | No study                                         | 1.45 (1.13-1.87); $I^2=0.0\%$ , $P=0.541$ ; n=2   |
|                                                       |                                  | <b>≥50 years</b>                 | No study                                         | 0.92 (0.51-1.67); $I^2=0.0\%$ , $P=0.903$ ; n=3   |
|                                                       |                                  | <b>&lt;50 years</b>              | No study                                         | 1.14 (0.86-1.53); $I^2=76.2\%$ , $P<0.001$ ; n=7  |
|                                                       | <b>Ethnicity</b>                 | <b>Non-Asian</b>                 | No study                                         | 1.10 (0.86-1.41); $I^2=64.9\%$ , $P=0.002$ ; n=10 |
|                                                       |                                  | <b>Asian</b>                     | No study                                         | No study                                          |
|                                                       | <b>Presence of diabetes</b>      | <b>Diabetic participants</b>     | No study                                         | 1.00 (0.48-2.07); $I^2=0.0\%$ , $P=0.788$ ; n=2   |
|                                                       |                                  | <b>Non-diabetic participants</b> | No study                                         | 1.32 (0.89-1.96); n=1                             |
|                                                       |                                  | <b>Combined</b>                  | No study                                         | 1.09 (0.80-1.49); $I^2=74.9\%$ , $P=0.001$ ; n=7  |
|                                                       | <b>Study quality<sup>a</sup></b> | <b>High</b>                      | No study                                         | 1.32 (0.64-2.72); $I^2=74.1\%$ , $P=0.004$ ; n=5  |
| <b>Relatively low</b>                                 |                                  | No study                         | 1.08 (0.85-1.38); $I^2=58.1\%$ , $P=0.049$ ; n=5 |                                                   |
| <b>Adjustment for age and BMI/obesity and smoking</b> | <b>Studies adjusting</b>         | No study                         | 0.92 (0.77-1.10); $I^2=0.0\%$ , $P=0.667$ ; n=3  |                                                   |
|                                                       | <b>Studies not adjusting</b>     | No study                         | 1.31 (0.88-1.96); $I^2=72.0\%$ , $P=0.002$ ; n=7 |                                                   |
| <b>CVD incidence in NAFLD vs. non-NAFLD</b>           | <b>Study design</b>              | <b>Population-based</b>          | No study                                         | 1.21 (1.09-1.35); $I^2=0.0\%$ , $P=0.996$ ; n=4   |
|                                                       |                                  | <b>Hospital-based</b>            | 1.81 (1.23-2.66); $I^2=79.8\%$ , $P<0.001$ ; n=6 | 4.24 (2.16-8.33); $I^2=0.0\%$ , $P=0.797$ ; n=3   |



|                                                       |                                  |                                                   |                                                   |                       |
|-------------------------------------------------------|----------------------------------|---------------------------------------------------|---------------------------------------------------|-----------------------|
| <b>Mean age</b>                                       | <b>≥50 years</b>                 | 1.29 (0.99-1.68); $I^2=60.7\%$ , $P=0.079$ ; n=3  | 1.17 (0.69-1.98); n=1                             |                       |
|                                                       | <b>&lt;50 years</b>              | 4.19 (1.40-12.60); $I^2=77.2\%$ , $P=0.012$ ; n=3 | 1.43 (1.10-1.85); $I^2=62.4\%$ , $P=0.021$ ; n=6  |                       |
| <b>Ethnicity</b>                                      | <b>Non-Asian</b>                 | 2.22 (1.23-4.01); $I^2=86.6\%$ , $P<0.001$ ; n=4  | 1.21 (1.09-1.35); $I^2=0.0\%$ , $P=0.996$ ; n=4   |                       |
|                                                       | <b>Asian</b>                     | 1.51 (0.96-2.37); $I^2=53.1\%$ , $P=0.144$ ; n=2  | 4.24 (2.16-8.33); $I^2=0.0\%$ , $P=0.797$ ; n=3   |                       |
| <b>Presence of diabetes</b>                           | <b>Diabetic participants</b>     | 1.83 (1.16-2.90); $I^2=82.5\%$ , $P<0.001$ ; n=5  | No study                                          |                       |
|                                                       | <b>Non-diabetic participants</b> | No study                                          | 4.24 (2.16-8.33); $I^2=0.0\%$ , $P=0.797$ ; n=3   |                       |
|                                                       | <b>Combined</b>                  | 1.89 (1.23-2.91); n=1                             | 1.21 (1.09-1.35); $I^2=0.0\%$ , $P=0.996$ ; n=4   |                       |
| <b>Study quality<sup>a</sup></b>                      | <b>High</b>                      | 1.45 (1.05-1.99); $I^2=73.2\%$ , $P=0.024$ ; n=3  | 1.17 (0.69-1.98); n=1                             |                       |
|                                                       | <b>Relatively low</b>            | 3.70 (0.86-15.93); $I^2=87.0\%$ , $P<0.001$ ; n=3 | 1.43 (1.10-1.85); $I^2=62.4\%$ , $P=0.021$ ; n=6  |                       |
| <b>Adjustment for age and BMI/obesity and smoking</b> | <b>Studies adjusting</b>         | 3.99 (1.13-14.07); $I^2=84.6\%$ , $P=0.002$ ; n=3 | 1.22 (1.09-1.36); $I^2=0.0\%$ , $P=0.977$ ; n=3   |                       |
|                                                       | <b>Studies not adjusting</b>     | 1.31 (0.95-1.81); $I^2=58.5\%$ , $P=0.090$ ; n=3  | 2.80 (1.18-6.68); $I^2=67.2\%$ , $P=0.028$ ; n=4  |                       |
| <b>CAD incidence in NAFLD vs. non-NAFLD</b>           | <b>Study design</b>              | <b>Population-based</b>                           | 1.94 (0.72-5.23); $I^2=59.1\%$ , $P=0.118$ ; n=2  | No study              |
|                                                       | <b>Mean age</b>                  | <b>Hospital-based</b>                             | 1.87 (1.45-2.39); $I^2=82.2\%$ , $P<0.001$ ; n=13 | 2.31 (1.46-3.65); n=1 |
|                                                       |                                  | <b>≥50 years</b>                                  | 2.76 (1.51-5.04); $I^2=79.4\%$ , $P<0.001$ ; n=8  | 2.31 (1.46-3.65); n=1 |
|                                                       |                                  | <b>&lt;50 years</b>                               | 1.33 (1.19-1.49); $I^2=26.1\%$ , $P=0.230$ ; n=7  | No study              |
|                                                       | <b>Ethnicity</b>                 | <b>Non-Asian</b>                                  | No study                                          | No study              |
|                                                       |                                  | <b>Asian</b>                                      | 1.87 (1.47-2.37); $I^2=80.2\%$ , $P<0.001$ ; n=15 | 2.31 (1.46-3.65); n=1 |
| <b>Presence of diabetes</b>                           | <b>Diabetic participants</b>     | 1.55 (0.92-2.62); $I^2=31.4\%$ , $P=0.233$ ; n=3  | No study                                          |                       |

|                                                      |                                                       |                                  |                                                   |                                                  |
|------------------------------------------------------|-------------------------------------------------------|----------------------------------|---------------------------------------------------|--------------------------------------------------|
|                                                      |                                                       | <b>Non-diabetic participants</b> | 2.37 (1.34-4.17); $I^2=30.3\%$ , $P=0.230$ ; n=4  | No study                                         |
|                                                      |                                                       | <b>Combined</b>                  | 1.85 (1.38-2.48); $I^2=88.0\%$ , $P<0.001$ ; n=8  | 2.31 (1.46-3.65); n=1                            |
|                                                      | <b>Study quality<sup>a</sup></b>                      | <b>High</b>                      | 1.30 (1.19-1.41); $I^2=0.0\%$ , $P=0.524$ ; n=5   | No study                                         |
|                                                      |                                                       | <b>Relatively low</b>            | 2.56 (1.55-4.23); $I^2=76.0\%$ , $P<0.001$ ; n=10 | 2.31 (1.46-3.65); n=1                            |
|                                                      | <b>Adjustment for age and BMI/obesity and smoking</b> | <b>Studies adjusting</b>         | 2.78 (1.64-4.70); $I^2=39.8\%$ , $P=0.141$ ; n=6  | 2.31 (1.46-3.65); n=1                            |
|                                                      |                                                       | <b>Studies not adjusting</b>     | 1.66 (1.29-2.14); $I^2=84.8\%$ , $P<0.001$ ; n=9  | No study                                         |
| <b>Hypertension incidence in NAFLD vs. non-NAFLD</b> | <b>Study design</b>                                   | <b>Population-based</b>          | 1.71 (1.10-2.65); n=1                             | No study                                         |
|                                                      |                                                       | <b>Hospital-based</b>            | 1.23 (1.12-1.35); $I^2=0.0\%$ , $P=0.934$ ; n=3   | 1.16 (1.06-1.27); $I^2=55.9\%$ , $P=0.059$ ; n=5 |
|                                                      | <b>Mean age</b>                                       | <b>≥50 years</b>                 | 1.71 (1.10-2.65); n=1                             | No study                                         |
|                                                      |                                                       | <b>&lt;50 years</b>              | 1.23 (1.12-1.35); $I^2=0.0\%$ , $P=0.934$ ; n=3   | 1.16 (1.06-1.27); $I^2=55.9\%$ , $P=0.059$ ; n=5 |
|                                                      | <b>Ethnicity</b>                                      | <b>Non-Asian</b>                 | 1.71 (1.10-2.65); n=1                             | No study                                         |
|                                                      |                                                       | <b>Asian</b>                     | 1.23 (1.12-1.35); $I^2=0.0\%$ , $P=0.934$ ; n=3   | 1.16 (1.06-1.27); $I^2=55.9\%$ , $P=0.059$ ; n=5 |
|                                                      | <b>Presence of diabetes</b>                           | <b>Diabetic participants</b>     | No study                                          | No study                                         |
|                                                      |                                                       | <b>Non-diabetic participants</b> | 1.23 (1.12-1.35); $I^2=0.0\%$ , $P=0.934$ ; n=3   | No study                                         |
|                                                      |                                                       | <b>Combined</b>                  | 1.71 (1.10-2.65); n=1                             | 1.16 (1.06-1.27); $I^2=55.9\%$ , $P=0.059$ ; n=5 |
|                                                      | <b>Study quality<sup>a</sup></b>                      | <b>High</b>                      | 1.71 (1.10-2.65); n=1                             | 1.16 (1.06-1.27); $I^2=55.9\%$ , $P=0.059$ ; n=5 |
|                                                      |                                                       | <b>Relatively low</b>            | 1.23 (1.20-1.35); $I^2=0.0\%$ , $P=0.934$ ; n=3   | No study                                         |

|                                                         |                                                       |                                  |                                                  |                                                  |
|---------------------------------------------------------|-------------------------------------------------------|----------------------------------|--------------------------------------------------|--------------------------------------------------|
|                                                         | <b>Adjustment for age and BMI/obesity and smoking</b> | <b>Studies adjusting</b>         | 1.71 (1.10-2.65); n=1                            | 1.09 (1.03-1.16); $I^2=0.0\%$ , $P=0.515$ ; n=3  |
|                                                         |                                                       | <b>Studies not adjusting</b>     | 1.23 (1.20-1.35); $I^2=0.0\%$ , $P=0.934$ ; n=3  | 1.34 (0.99-1.82); $I^2=75.2\%$ , $P=0.044$ ; n=2 |
| <b>Atherosclerosis incidence in NAFLD vs. non-NAFLD</b> | <b>Study design</b>                                   | <b>Population-based</b>          | 1.28 (1.14-1.43); $I^2=0.0\%$ , $P=0.480$ ; n=4  | No study                                         |
|                                                         | <b>Mean age</b>                                       | <b>Hospital-based</b>            | 4.80 (1.80-12.80); n=1                           | No study                                         |
|                                                         |                                                       | <b>≥50 years</b>                 | 1.28 (1.14-1.43); $I^2=0.0\%$ , $P=0.480$ ; n=4  | No study                                         |
|                                                         |                                                       | <b>&lt;50 years</b>              | 4.80 (1.80-12.80); n=1                           | No study                                         |
|                                                         | <b>Ethnicity</b>                                      | <b>Non-Asian</b>                 | 1.15 (0.86-1.54); $I^2=34.0\%$ , $P=0.218$ ; n=2 | No study                                         |
|                                                         |                                                       | <b>Asian</b>                     | 1.48 (1.08-2.03); $I^2=69.9\%$ , $P=0.036$ ; n=3 | No study                                         |
|                                                         | <b>Presence of diabetes</b>                           | <b>Diabetic participants</b>     | No study                                         | No study                                         |
|                                                         |                                                       | <b>Non-diabetic participants</b> | 4.80 (1.80-12.80); n=1                           | No study                                         |
|                                                         |                                                       | <b>Combined</b>                  | 1.28 (1.14-1.43); $I^2=0.0\%$ , $P=0.480$ ; n=4  | No study                                         |
|                                                         | <b>Study quality<sup>a</sup></b>                      | <b>High</b>                      | 1.28 (1.14-1.43); $I^2=0.0\%$ , $P=0.480$ ; n=4  | No study                                         |
|                                                         |                                                       | <b>Relatively low</b>            | 4.80 (1.80-12.80); n=1                           | No study                                         |
|                                                         | <b>Adjustment for age and BMI/obesity and smoking</b> | <b>Studies adjusting</b>         | 1.31 (1.15-1.50); $I^2=0.0\%$ , $P=0.796$ ; n=2  | No study                                         |
|                                                         |                                                       | <b>Studies not adjusting</b>     | 1.33 (0.96-1.84); $I^2=78.2\%$ , $P=0.010$ ; n=3 | No study                                         |

|                                                       |                                  |                                  |                                                  |                                                  |
|-------------------------------------------------------|----------------------------------|----------------------------------|--------------------------------------------------|--------------------------------------------------|
| <b>Overall mortality in NASH vs. non-NASH</b>         | <b>Study design</b>              | <b>Population-based</b>          | No study                                         | 0.80 (0.52-1.22); n=1                            |
|                                                       | <b>Mean age</b>                  | <b>Hospital-based</b>            | No study                                         | 1.56 (0.94-2.58); $I^2=89.5\%$ , $P<0.001$ ; n=4 |
|                                                       |                                  | <b>≥50 years</b>                 | No study                                         | 1.13 (0.74-1.72); n=1                            |
|                                                       |                                  | <b>&lt;50 years</b>              | No study                                         | 1.44 (0.80-2.57); $I^2=89.3\%$ , $P<0.001$ ; n=4 |
|                                                       | <b>Ethnicity</b>                 | <b>Non-Asian</b>                 | No study                                         | 1.37 (0.86-2.19); $I^2=86.4\%$ , $P<0.001$ ; n=5 |
|                                                       |                                  | <b>Asian</b>                     | No study                                         | No study                                         |
|                                                       | <b>Presence of diabetes</b>      | <b>Diabetic participants</b>     | No study                                         | No study                                         |
|                                                       |                                  | <b>Non-diabetic participants</b> | No study                                         | No study                                         |
|                                                       |                                  | <b>Combined</b>                  | No study                                         | 1.37 (0.86-2.19); $I^2=86.4\%$ , $P<0.001$ ; n=5 |
|                                                       | <b>Study quality<sup>a</sup></b> | <b>High</b>                      | No study                                         | 0.80 (0.52-1.23); n=1                            |
| <b>Relatively low</b>                                 |                                  | No study                         | 1.56 (0.94-2.59); $I^2=85.9\%$ , $P<0.001$ ; n=4 |                                                  |
| <b>Adjustment for age and BMI/obesity and smoking</b> | <b>Studies adjusting</b>         | No study                         | No study                                         |                                                  |
|                                                       | <b>Studies not adjusting</b>     | No study                         | 1.37 (0.86-2.19); $I^2=86.4\%$ , $P<0.001$ ; n=5 |                                                  |
| <b>CVD mortality in NASH vs. non-NASH</b>             | <b>Study design</b>              | <b>Population-based</b>          | No study                                         | 0.59 (0.29-1.20); n=1                            |
|                                                       | <b>Mean age</b>                  | <b>Hospital-based</b>            | No study                                         | 1.41 (0.61-3.22); $I^2=83.8\%$ , $P<0.001$ ; n=4 |
|                                                       |                                  | <b>≥50 years</b>                 | No study                                         | 0.51 (0.23-1.12); n=1                            |

|                                                       |                                  |          |                                                  |
|-------------------------------------------------------|----------------------------------|----------|--------------------------------------------------|
| <b>Ethnicity</b>                                      | <b>&lt;50 years</b>              | No study | 1.44 (0.65-3.20); $I^2=83.2\%$ , $P<0.001$ ; n=4 |
|                                                       | <b>Non-Asian</b>                 | No study | 1.18 (0.57-2.48); $I^2=83.3\%$ , $P<0.001$ ; n=5 |
|                                                       | <b>Asian</b>                     | No study | No study                                         |
| <b>Presence of diabetes</b>                           | <b>Diabetic participants</b>     | No study | No study                                         |
|                                                       | <b>Non-diabetic participants</b> | No study | No study                                         |
|                                                       | <b>Combined</b>                  | No study | 1.18 (0.57-2.48); $I^2=83.3\%$ , $P<0.001$ ; n=5 |
| <b>Study quality<sup>a</sup></b>                      | <b>High</b>                      | No study | 0.59 (0.29-1.20); n=1                            |
|                                                       | <b>Relatively low</b>            | No study | 1.41 (0.61-3.22); $I^2=83.8\%$ , $P<0.001$ ; n=4 |
| <b>Adjustment for age and BMI/obesity and smoking</b> | <b>Studies adjusting</b>         | No study | No study                                         |
|                                                       | <b>Studies not adjusting</b>     | No study | 1.18 (0.57-2.48); $I^2=83.3\%$ , $P<0.001$ ; n=5 |

---

<sup>a</sup> We considered a cross-sectional study awarded 5 stars and a cohort study awarded 8 or more stars as a high quality study in current study, as no standard criteria has been established

**Figure S2.** Sensitivity analyses. Pooled relative risks for cardiovascular events associated with non--alcoholic fatty liver disease by omitting one study in turn.

**A. Overall mortality**

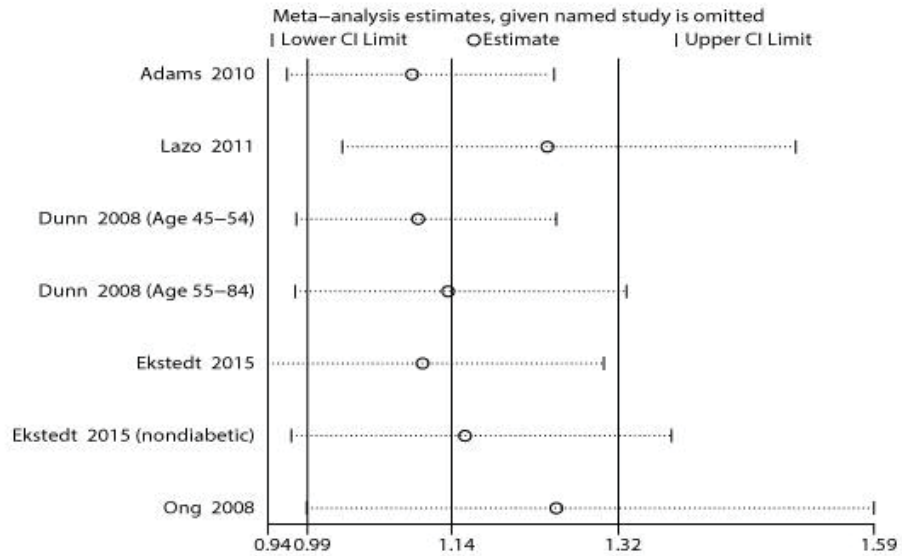

**B. CVD mortality**

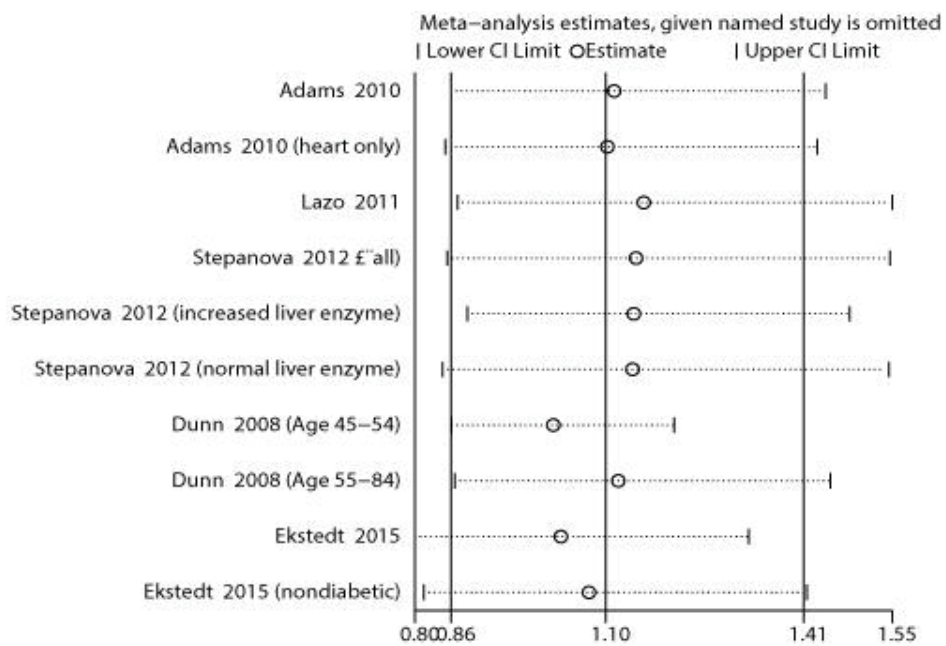

### C. CVD prevalence (Cross-sectional studies)

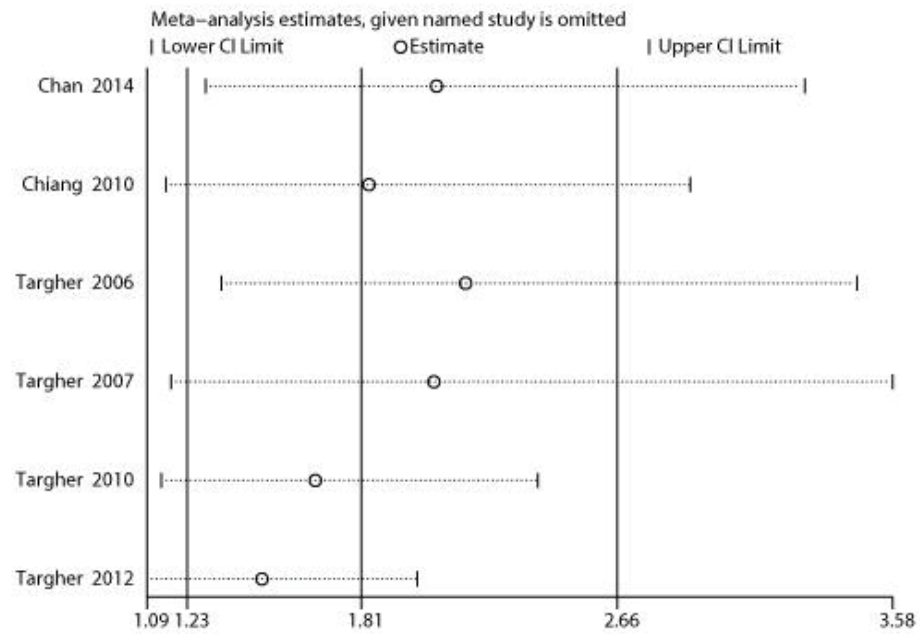

### D. CVD incidence (Cohort studies)

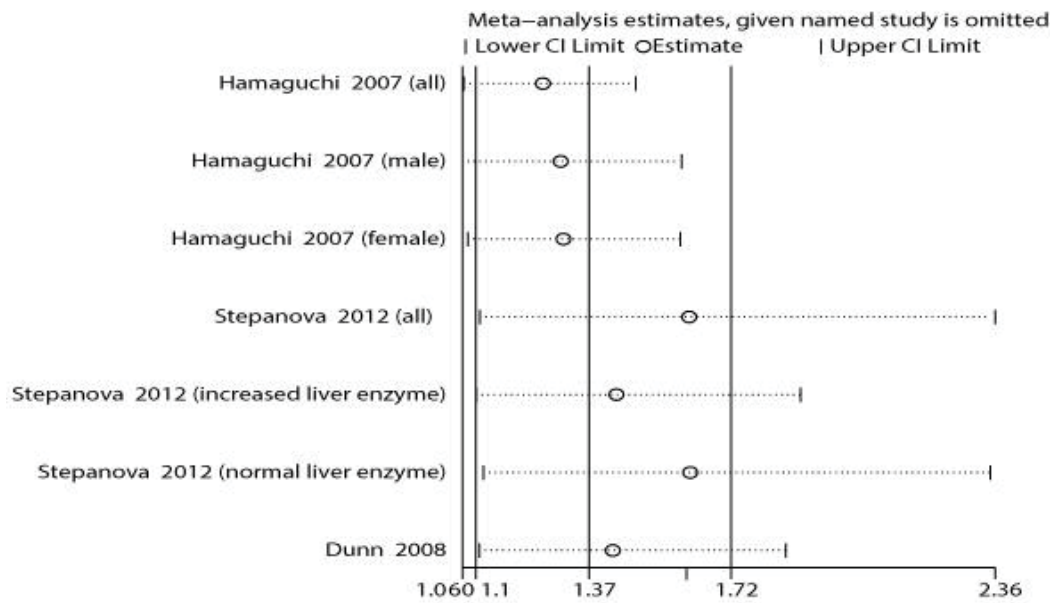

### E. CAD prevalence (Cross-sectional studies)

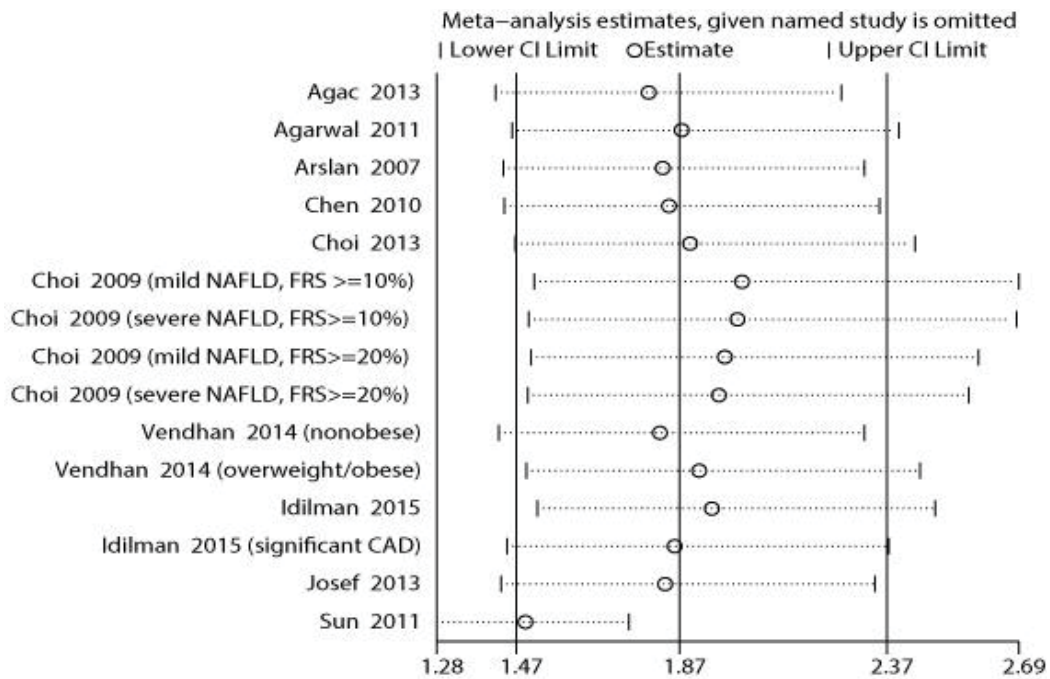

### F. Hypertension prevalence (Cross-sectional studies)

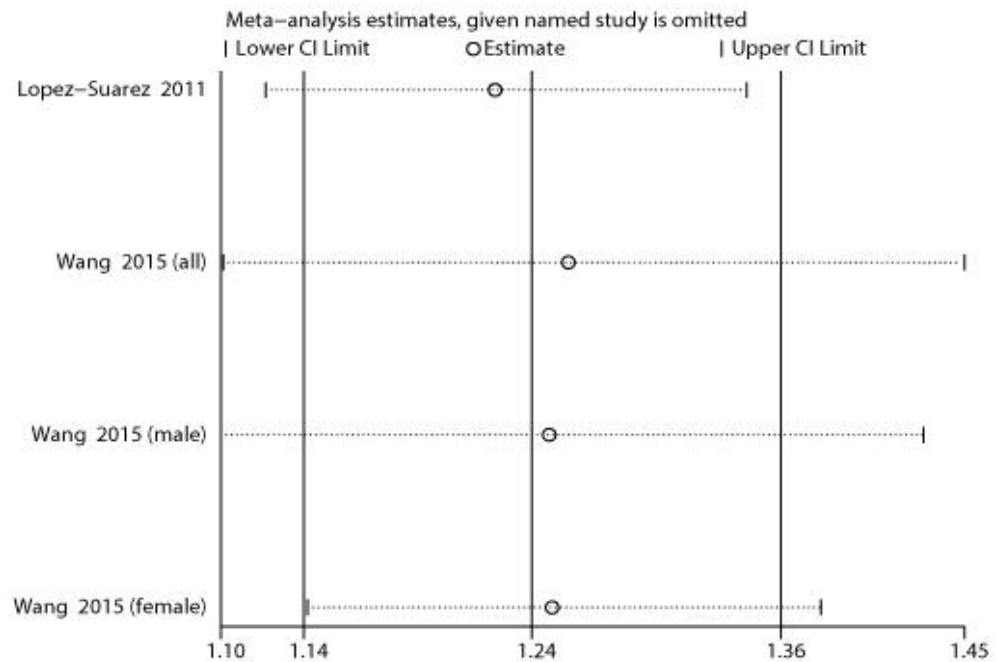



### G. Hypertension incidence (Cohort studies)

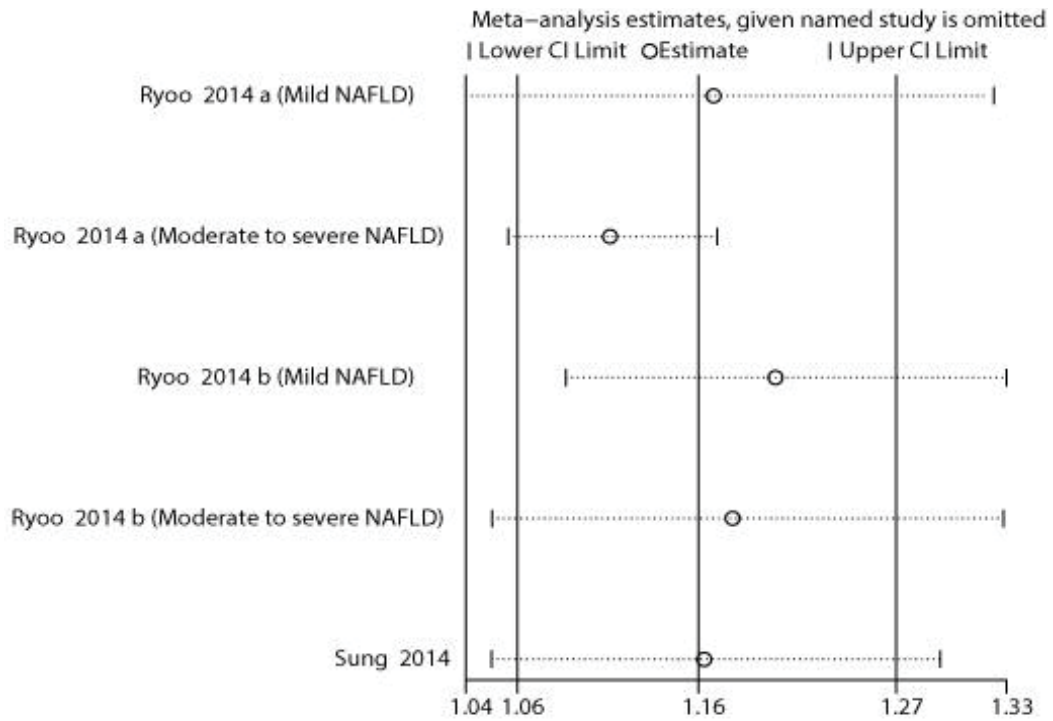

### H. Atherosclerosis prevalence

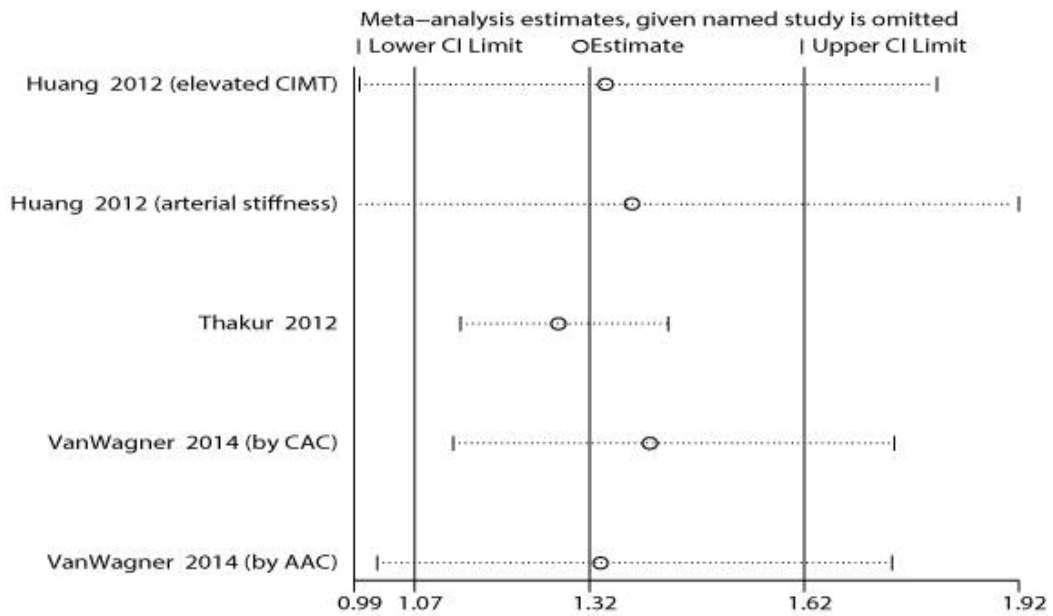

### I. NASH: Overall mortality

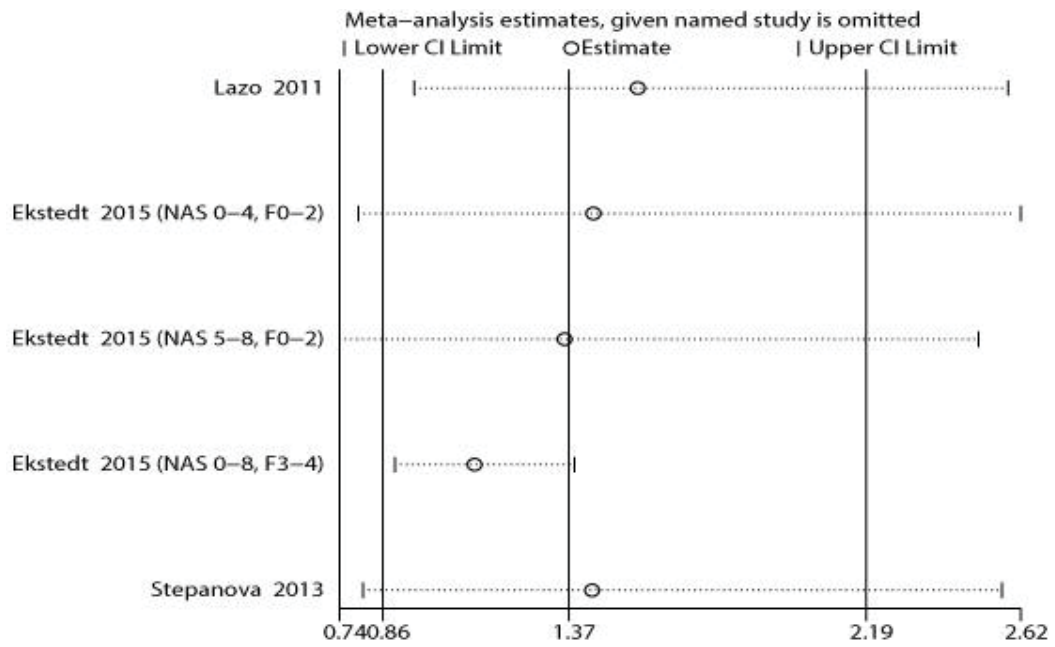

### J. NASH: CVD mortality

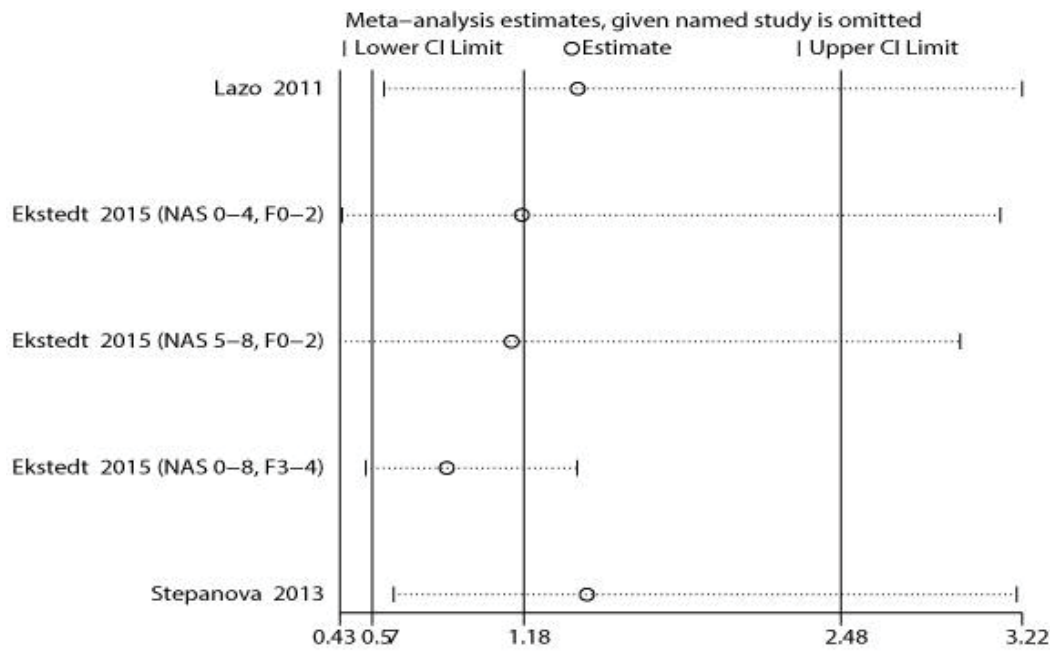

### Figure S3. Funnel plots to assess publication bias

Plots show study size as a function of effect size for studies included in the meta-analysis.

#### A. Overall mortality

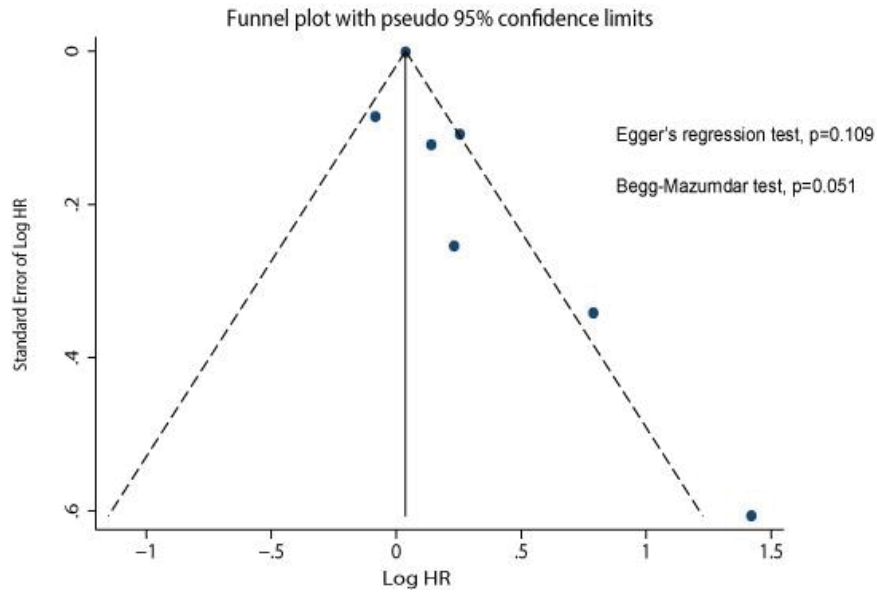

#### B. CVD mortality

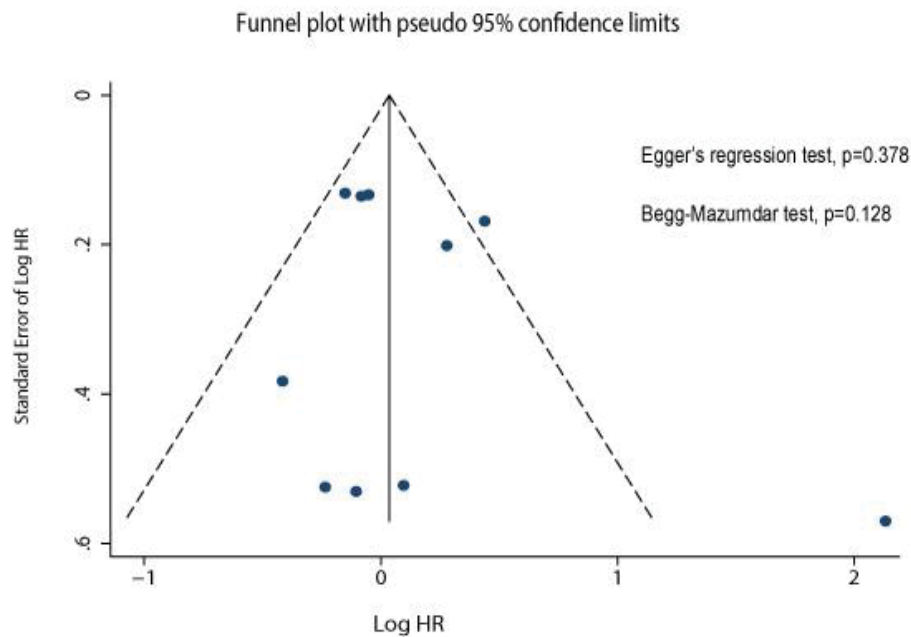

### C. CVD prevalence (Cross-sectional studies)

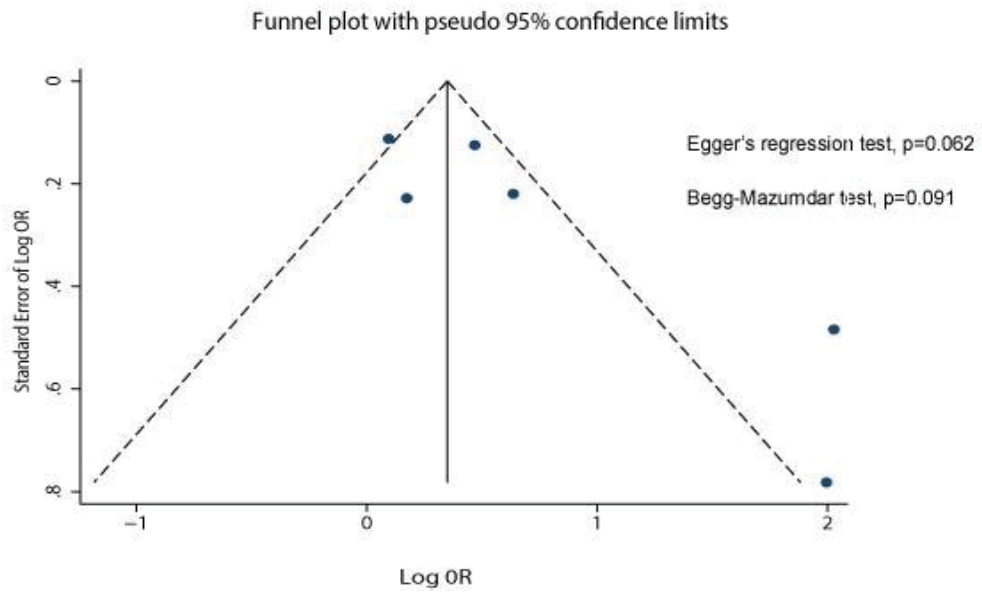

### D. CVD incidence (Cohort studies)

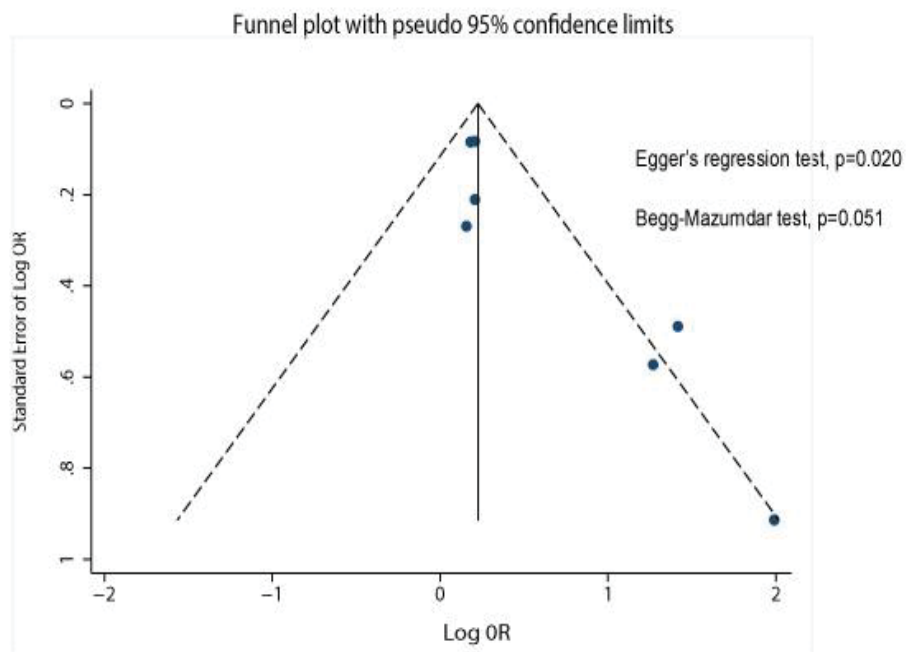

E. CVD incidence (Cohort studies) after using the trim and fill approach.  
1 study was filled. Pooled HR (95% CI) after filling was 1.36 (1.06-1.74)

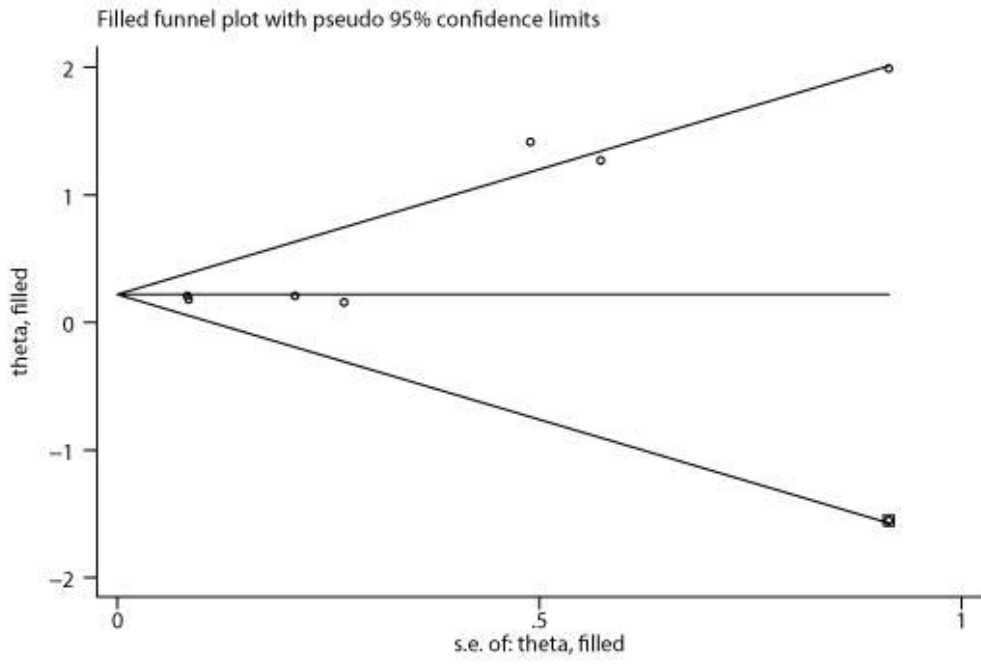

**F. CAD prevalence(Cross-sectional studies)**

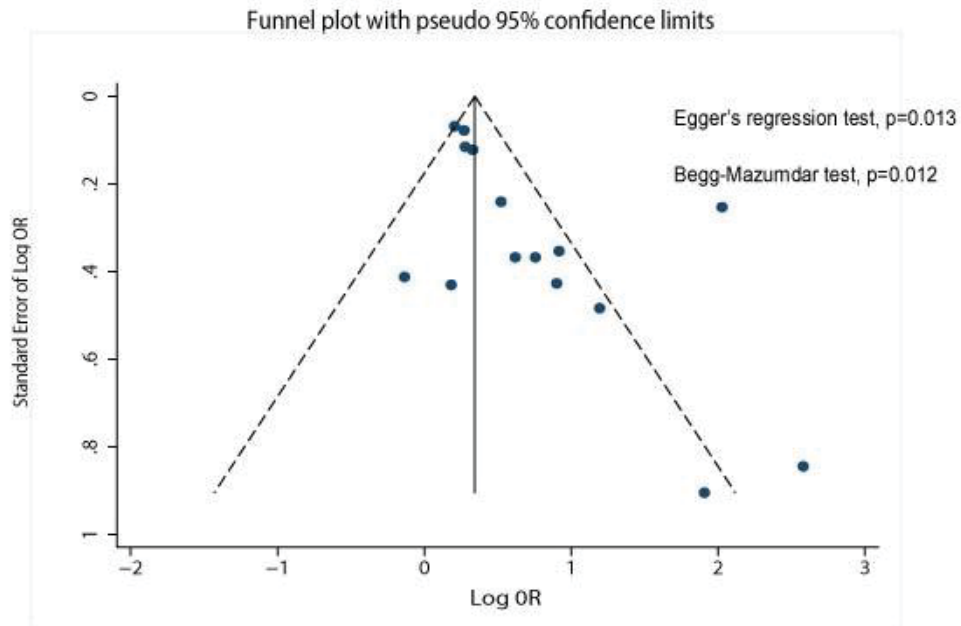

**G. CAD prevalence(Cross-sectional studies) after using the trim and fill approach.  
6 studies was filled. Pooled OR (95% CI) after filling was 1.36 (1.04-1.77)**

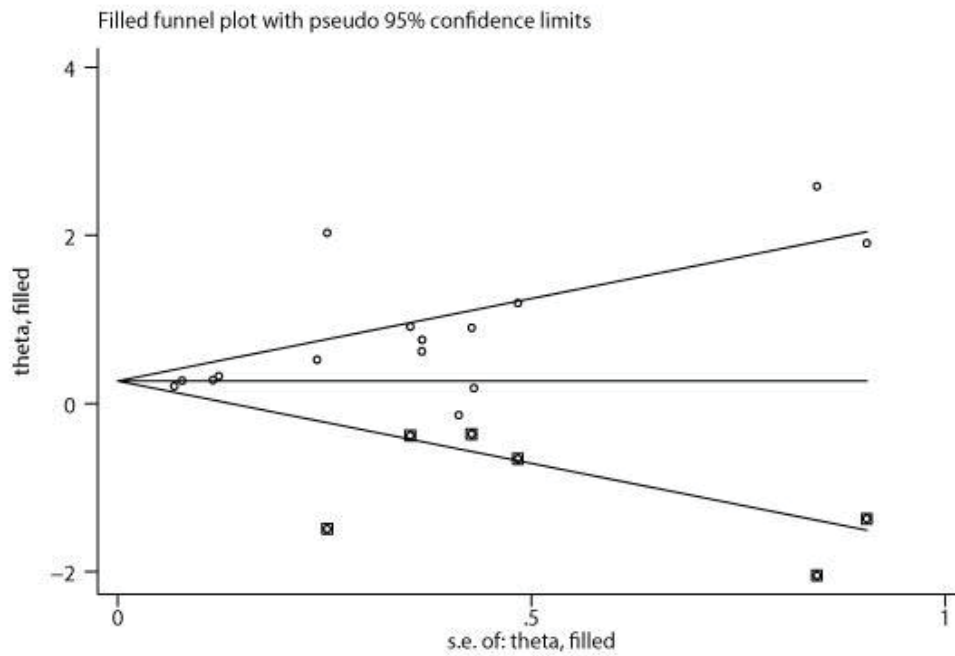

## H. Hypertension prevalence (Cross-sectional studies)

|

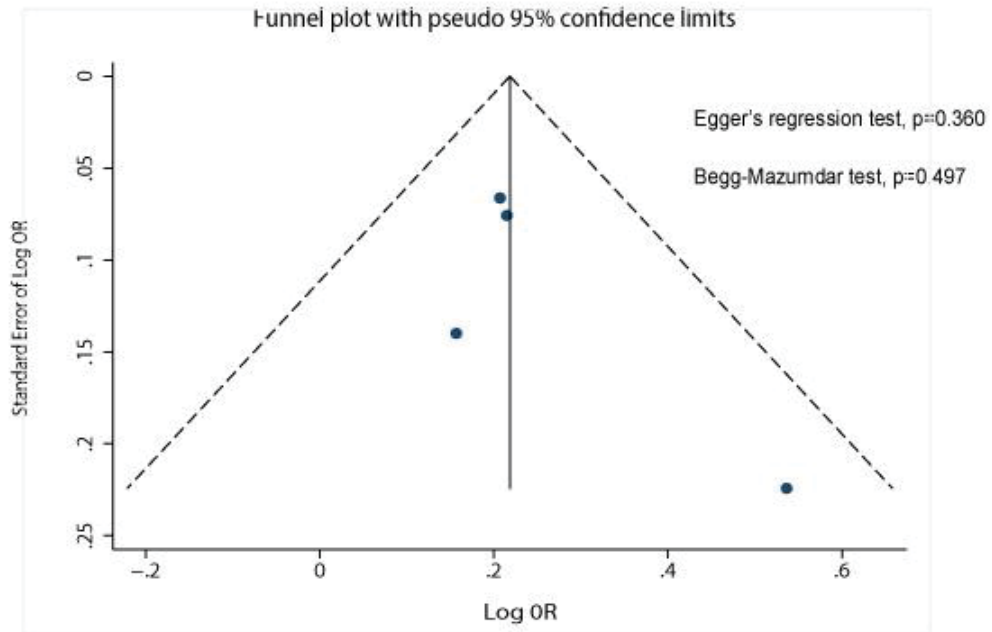

### I. Hypertension incidence (Cohort studies)

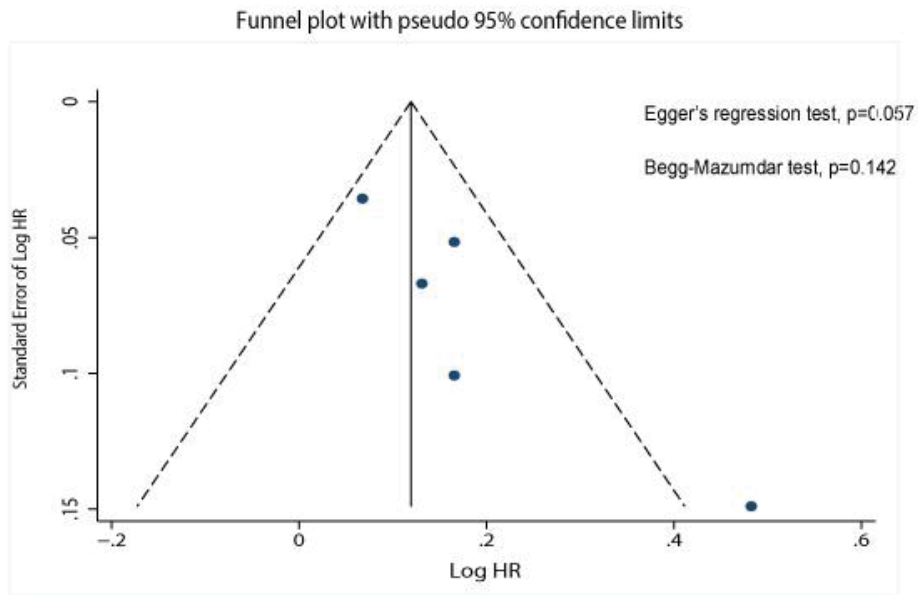

### J. Atherosclerosis prevalence

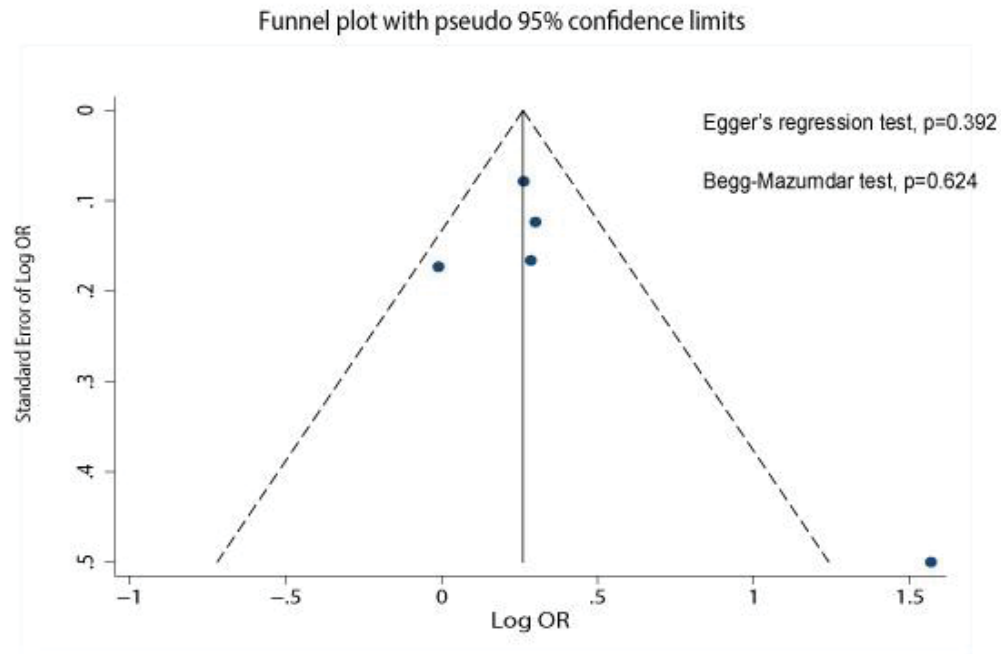



### K. NASH: overall mortality

Funnel plot with pseudo 95% confidence limits

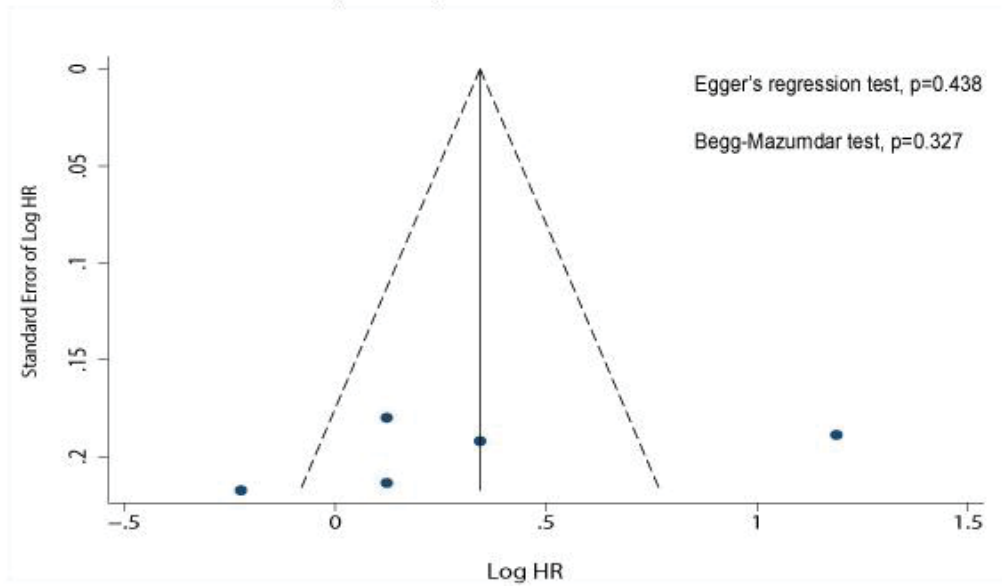

### L. NASH: CVD mortality

Funnel plot with pseudo 95% confidence limits

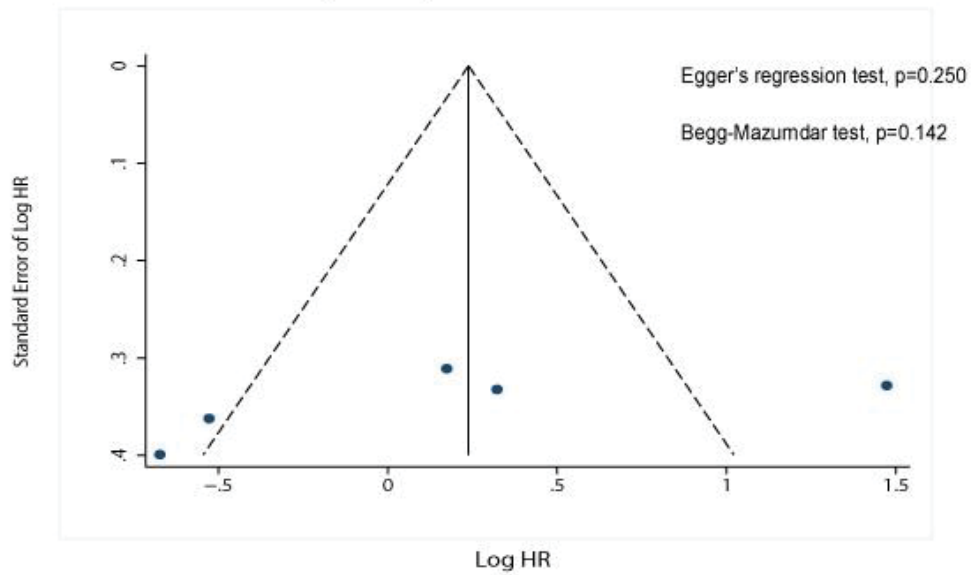

Supplement: srep33386-s1.pdf [file srep33386-s1.pdf]
